# Supplementary material
Source: Springer Nature journal article supplement (https://www.springermedizin.de/resource/supplementary/13685_2014_31_MOESM16_ESM.pdf/9681246)

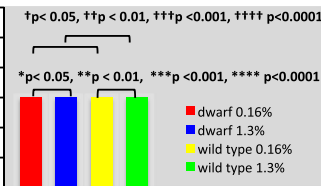

# Glutathione Metabolism

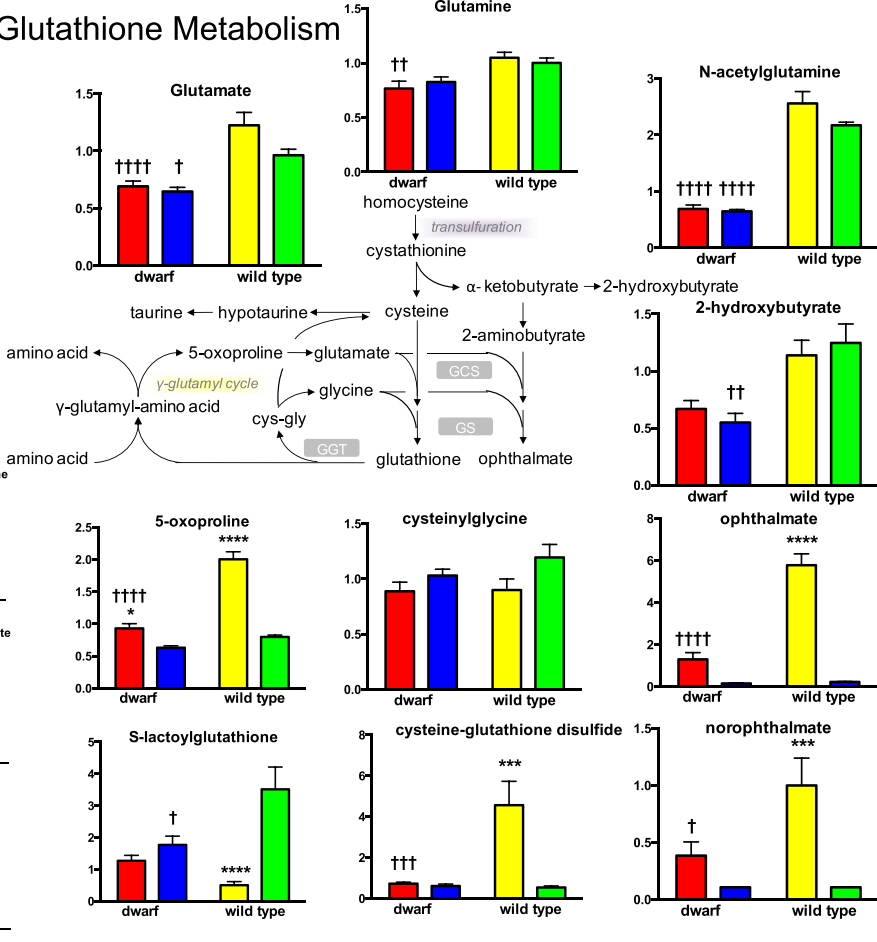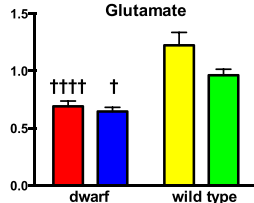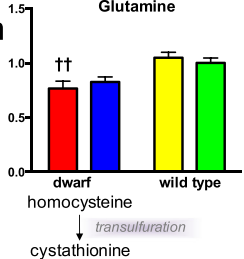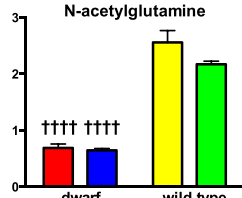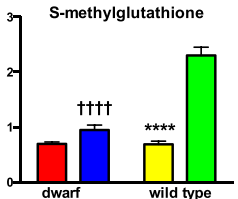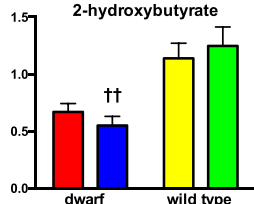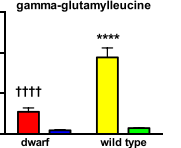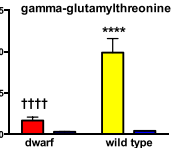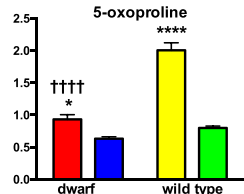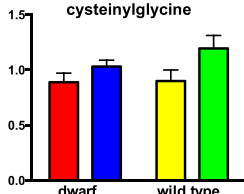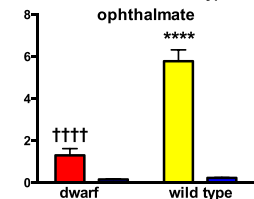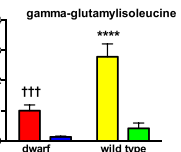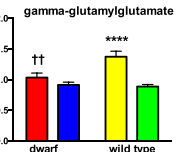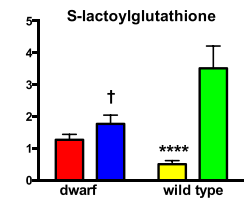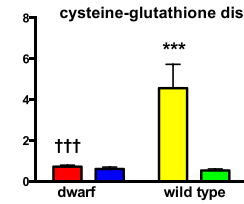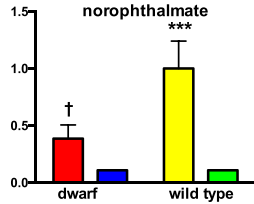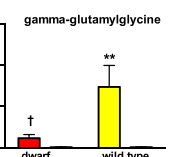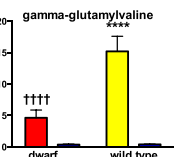

Supplement: MOESM16 [file 9681246]
